# Supplementary material for: Prevalence of c-KIT Mutations in Gonadoblastoma and Dysgerminomas of Patients with Disorders of Sex Development (DSD) and Ovarian Dysgerminomas
Source: PLoS One. 2012 Aug 28;7(8):e43952. doi: 10.1371/journal.pone.0043952 (PMC3429439; doi:10.1371/journal.pone.0043952)
Supplement: Table S1 — c-KIT and PDGFRA primers. (XLS) [file pone.0043952.s002.xls]

## Sheet: Sheet1
Table S1: c-KIT and PDGFRA primers
Primers pairs for sequence analysis of c-KIT in DNA from FFPE tissue
Exon	Primer	Sequence*	Product size (bp)	anneal. T (°C)	Tm (°C)
8	c-kit 8 M13 for	TGT AAA ACG ACG GCC AGT CAG CAC TCT GAC ATA TGG CC	191	60	59.3
	c-kit 8 M13 rev	CAG GAA ACA GCT ATG ACC CTC TGC ATT ATA AGC AGT GCC			57.7
9A	c-kit 9/1 M13 for	TGT AAA ACG ACG GCC AGT CAG GGC TTT TGT TTT CTT CCC	141	60	62.1
	c-kit 9/1 M13 rev	CAG GAA ACA GCT ATG ACC GCC ATT GTG CTT GAA TGC AC			62.6
9B	c-kit 9/2 M13 for	TGT AAA ACG ACG GCC AGT GCT AGT GGT TCA GAG TTC TA	167	60	49.6
	c-kit 9/2 M13 rev	CAG GAA ACA GCT ATG ACC CCT AAA CAT CCC CTT AAA TTG G			58.8
11	c-kit 11 M13 for	TGT AAA ACG ACG GCC AGT AGG TGA TCT ATT TTT CCC TTT C	189	60	55.6
	c-kit 11 M13 rev	CAG GAA ACA GCT ATG ACC GTG ACA TGG AAA GCC CCT G			61.5
13	c-kit 13 M13 for	TGT AAA ACG ACG GCC AGT GTG CTT TTT GCT AAA ATG CAT	168	60	57.2
	c-kit 13 M13 rev	CAG GAA ACA GCT ATG ACC GGC AGC TTG GAC ACG GC			64.1
17	c-kit 17 M13 for	TGT AAA ACG ACG GCC AGT GTT TTC TTT TCT CCT CCA ACC	178	60	56.9
	c-kit 17 M13 rev	CAG GAA ACA GCT ATG ACC GAC TGT CAA GCA GAG AAT GG			55.9
M13 forward primer		TGT AAA ACG ACG GCC AGT
M13 reverse primer		CAG GAA ACA GCT ATG ACC
* Product size incl. primersequence, excl. sequence M13-tail
Primers pairs for sequence analysis of PDGFRa in DNA from FFPE tissue
Exon	Primer	Sequence*	Product size (bp)	anneal. T (°C)	Tm (°C)
12A	PDGFRa 12.1 M13 for	TGT AAA ACG ACG GCC AGT TTC ACC AGT TAC CTG TCC TG	132	60	56.1
	PDGFRa 12.1 M13 rev	CAG GAA ACA GCT ATG ACC CTT GAG TCA TAA GGC AGC TG			56.3
12B	PDGFRa 12.2 M13 for	TGT AAA ACG ACG GCC AGT CCG AGG TAT GAA ATT CGC TG	195	60	48.1
	PDGFRa 12.2 M13 rev	CAG GAA ACA GCT ATG ACC AGG GAG TCT TGG GAG GTT AC			57.2
14	PDGFRa 14.1 M13 for	TGT AAA ACG ACG GCC AGT TGG TAG CTC AGC TGG ACT GAT	190	60	60.0
	PDGFRa 14.1 M13 rev	CAG GAA ACA GCT ATG ACC CCA GTG AAA ATC CTC ACT CCA			60.1
18	PDGFRa 18 M13 for	TGT AAA ACG ACG GCC AGT CTT GAT CCT GAG TCA TTT CTT C	186	60	55.6
	PDGFRa 18 M13 rev	CAG GAA ACA GCT ATG ACC CTG ACC AGT GAG GGA AGT G			56.6
M13 forward primer		TGT AAA ACG ACG GCC AGT
M13 reverse primer		CAG GAA ACA GCT ATG ACC
* Product size incl. primersequence, excl. sequence M13-tail
